# Supplementary material for: Effective strategies for improving the electrochemical properties of highly porous Si foam anodes in lithium-ion batteries
Source: Royal Society of Chemistry journal article supplement (doi:10.1039/c4ta02392g), 2014-01-01
Supplement: c4ta02392g1.pdf [file c4ta02392g1.pdf]

## Supplementary Information

### **Effective Strategies for Improving Electrochemical Properties of Highly Porous Si Foam Anodes in Lithium-Ion Batteries**

Taesoo Bok,<sup>a</sup> Sinho Choi,<sup>a</sup> Jeongchan Lee,<sup>b</sup> and Soojin Park\*<sup>a</sup>

<sup>a</sup> Interdisciplinary School of Green Energy, Ulsan National Institute of Science and Technology (UNIST), Ulsan 689-798, Korea

<sup>b</sup> Duksan Hi-metal company, Yeonam-Dong, Buk-gu, Ulsan 683-804, Korea

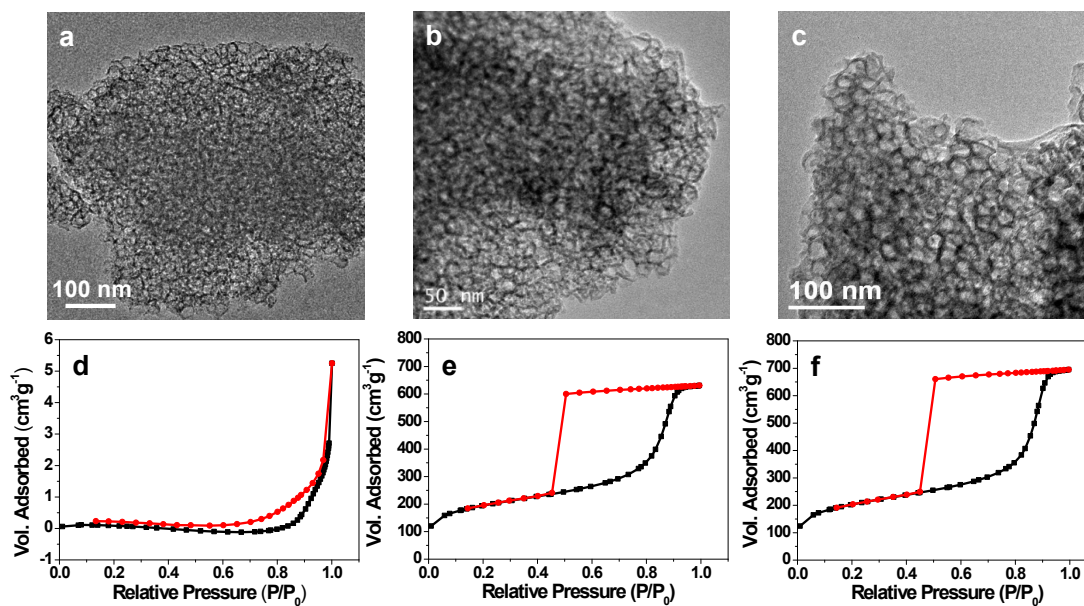

**Fig. S1** TEM images of (a) no-calcined SiO<sub>2</sub> foam, (b) air-calcined SiO<sub>2</sub> foam, and (c) oxygen-calcined SiO<sub>2</sub> foam. BET plots of (d) no-calcined SiO<sub>2</sub> foam, (e) air-calcined SiO<sub>2</sub> foam, and (f) oxygen-calcined SiO<sub>2</sub> foam. SEM images of three samples show a similar sponge-like morphology. However, the surface areas of no-calcined SiO<sub>2</sub>, air-calcined SiO<sub>2</sub> and oxygen-calcined SiO<sub>2</sub> foam are 0.13 m<sup>2</sup>/g, 657.9 m<sup>2</sup>/g, and 686.2 m<sup>2</sup>/g, respectively.

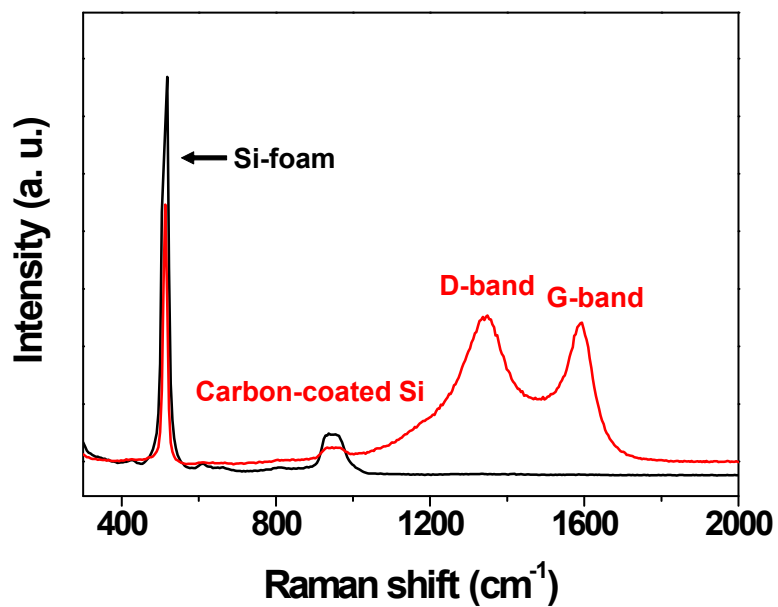

**Fig. S2** Raman spectra of as-synthesized Si foam (black line) and carbon-coated Si foam (red line). D/G ratio of 2.21 indicates that amorphous carbon was coated on the Si surface.

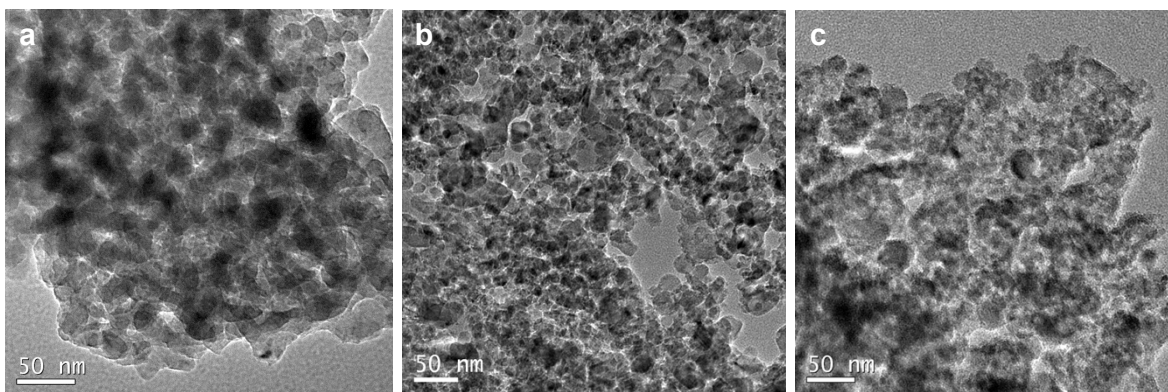

**Fig. S3** TEM images of (a) carbon-coated ncSi foam, (b) carbon-coated acSi foam, and (c) carbon-coated ocSi foam.

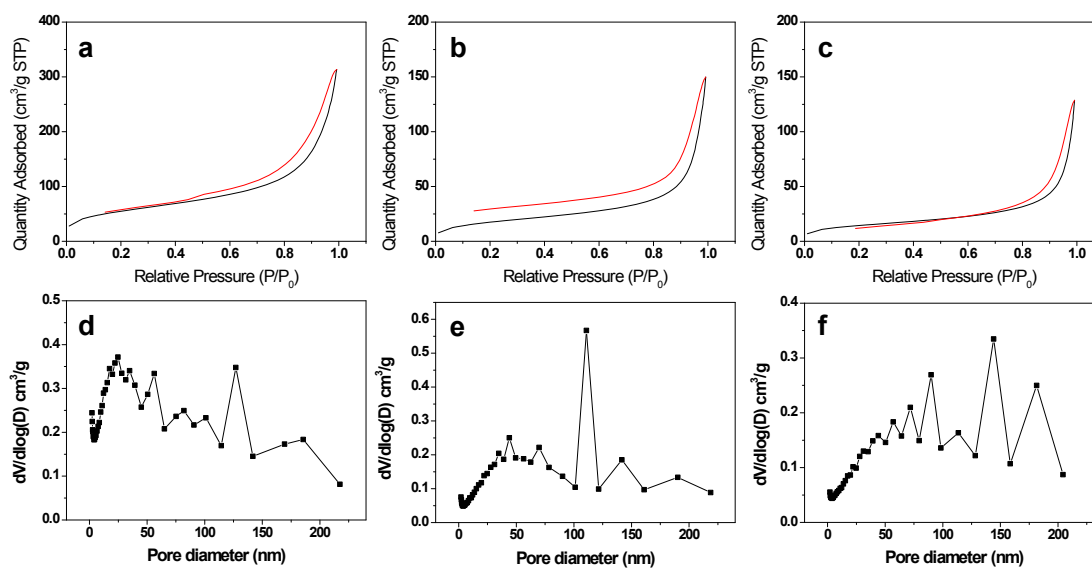

**Fig. S4** Surface area and pore size distribution of (a) carbon-coated ncSi foam, (b) carbon-coated acSi foam, and (c) carbon-coated ocSi foam. The surface areas of carbon-coated ncSi, acSi, and ocSi particles are 194.5 m<sup>2</sup>/g, 63.2 m<sup>2</sup>/g, and 51.8 m<sup>2</sup>/g, respectively.

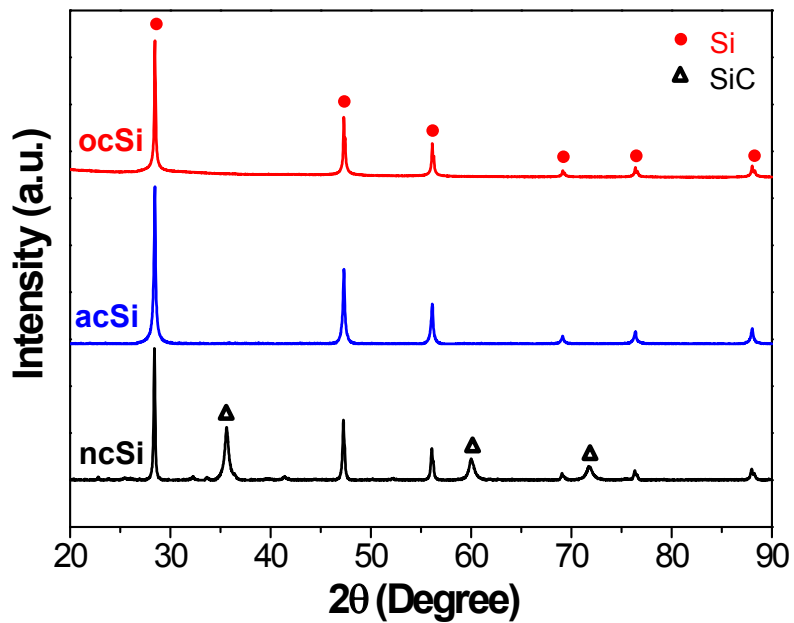

**Fig. S5** XRD patterns of ocSi (top), acSi (middle), and ncSi (bottom) particles. In particular, ncSi particles show an existence of SiC layer that was formed during magnesiothermic reaction.

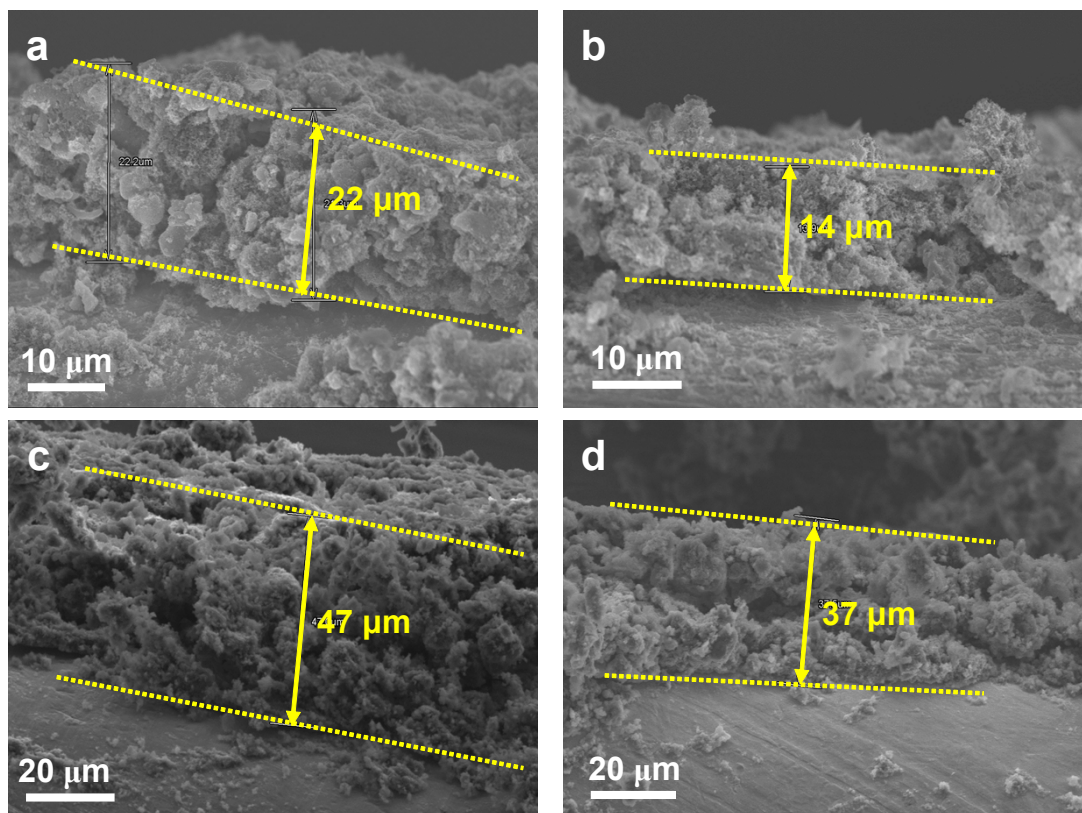

**Fig. S6** Cross-sectional SEM images showing volume expansion of two Si electrodes (with and without NaCl) before and after 100 cycles. Electrode thicknesses of Si with NaCl (a: before, c: after cycle) and Si without NaCl (b: before, d: after cycle). The Si electrodes synthesized in the presence of NaCl showed volume expansion of 120% after 100 cycles, while Si electrode without NaCl exhibited 160%.

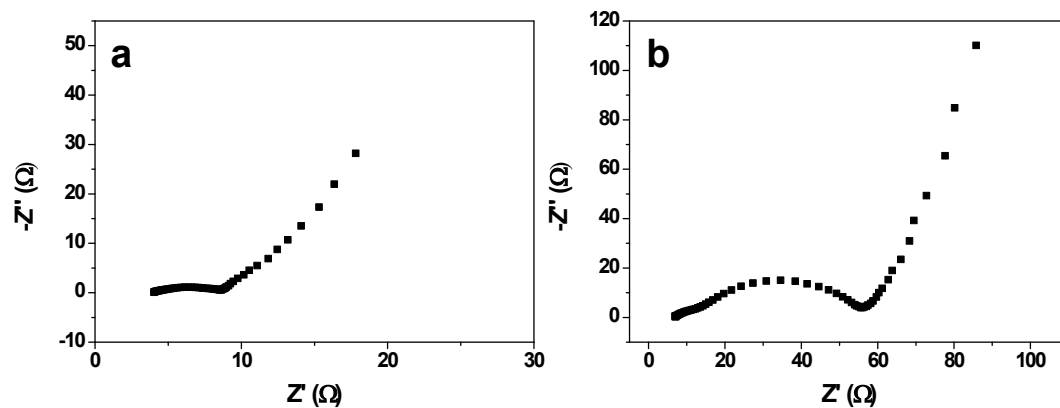

**Fig. S7** Nyquist plots of the electrochemical impedance spectra of (a) Ag-loaded ocSi and (b) ocSi electrodes after 50 cycles at a rate of 0.2 C.

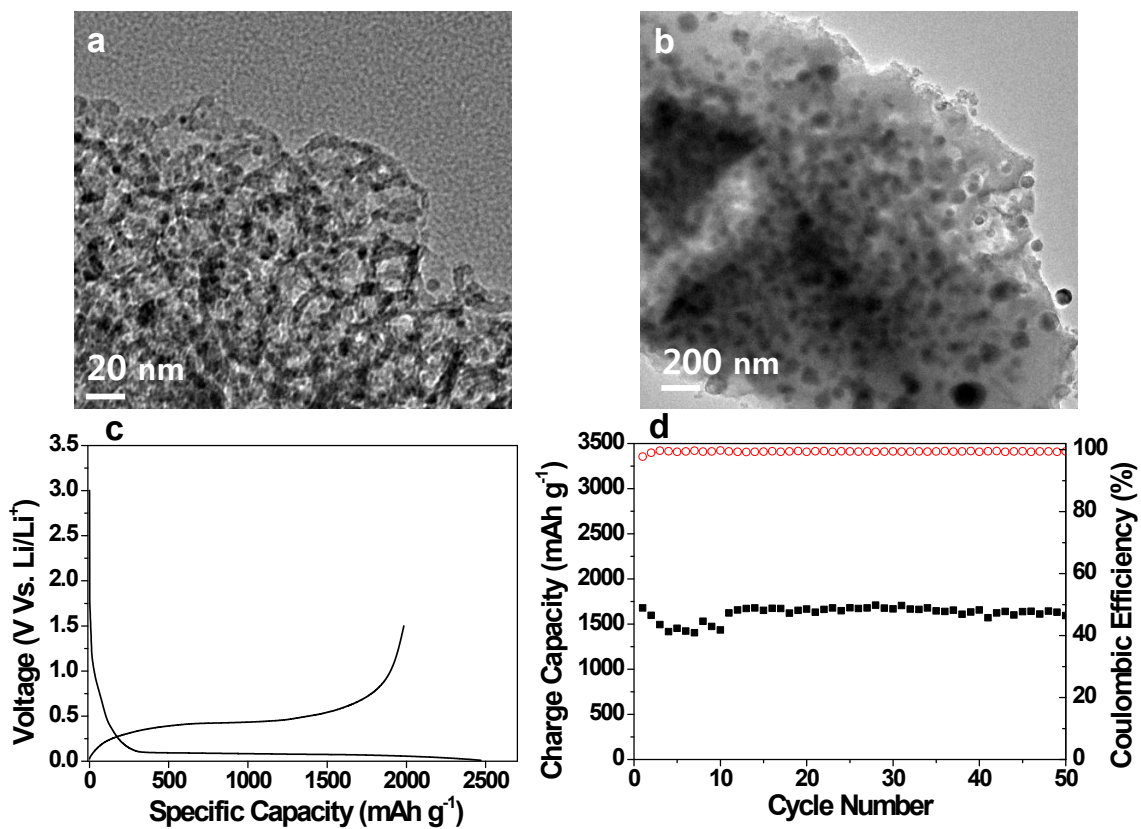

**Fig. S8** TEM images of (a) Cu-loaded SiO<sub>2</sub> foam and (b) Cu-doped Si particles. (c) First cycle voltage profile of the Cu-doped Si anode was obtained at 0.05 C rate between 0.005 and 1.2 V. (d) Cycling retention of the Cu-doped Si was obtained at 0.2 C rate (discharge-charge) until 50 cycles. After 50 cycles, a high reversible capacity of 1410 mAh g<sup>-1</sup> was seen with good capacity retention of 84.2%, compared to initial capacity.
